# Supplementary material
Source: PubMed Central journal article supplement (PMC6709862)
Supplement: NIHMS1042081-supplement-Supplementary.pdf [file NIHMS1042081-supplement-Supplementary.pdf]

# Electronic Supplementary Information

## Nanowarming using Ferromagnetic CoFe Nanowires

Daniel Shore,<sup>\*a</sup> Adrian Ghemes,<sup>b</sup> Oana Dragos,<sup>b</sup> Zhe Gao,<sup>c</sup> Qi Shao,<sup>c</sup> Anirudh Sharma,<sup>c</sup> Joseph Um,<sup>d</sup> Ibro Tabakovic,<sup>d</sup> John Bischof,<sup>c</sup> and Bethanie JH Stadler<sup>a,d</sup>

<sup>a</sup> *Department of Chemical Engineering & Materials Science, University of Minnesota Twin Cities, Minneapolis, MN.*

<sup>b</sup> *National Institute of R&D for Technical Physics, Iasi, Romania.*

<sup>c</sup> *Department of Mechanical Engineering, University of Minnesota Twin Cities, Minneapolis, MN*

<sup>d</sup> *Department of Electrical & Computer Engineering, University of Minnesota Twin Cities, Minneapolis, MN.*

- Fig. S1. Segmented nanowire fabrication and coating**
- Fig. S2. Additional SEM images CoFe nanowires**
- Fig. S3. X-ray diffraction spectra from CoFe nanowires**
- Fig. S4. Temperature curves for CoFe, Co, Ni nanowires**
- Fig. S5. Magnetic nanowire alignment apparatus**
- Fig. S6. Additional nanowarming temperature curves**
- Fig. S7. Parallel minor loops for Ni, Co, Fe nanowires, perpendicular minor loops for CoFe nanowires**
- Fig. S8. Iron concentration measurements by  $T_1$  relaxation**
- Fig. S9. Table S2. Effect of coating of segmented CoFe nanowires on relaxivity values**
- Table S1. Electrodeposition parameters**
- Table S2. Hysteresis Parameters for CoFe, Fe, Co and Ni nanowires**
- Appendix Iron concentrations and suspension effects of coatings**

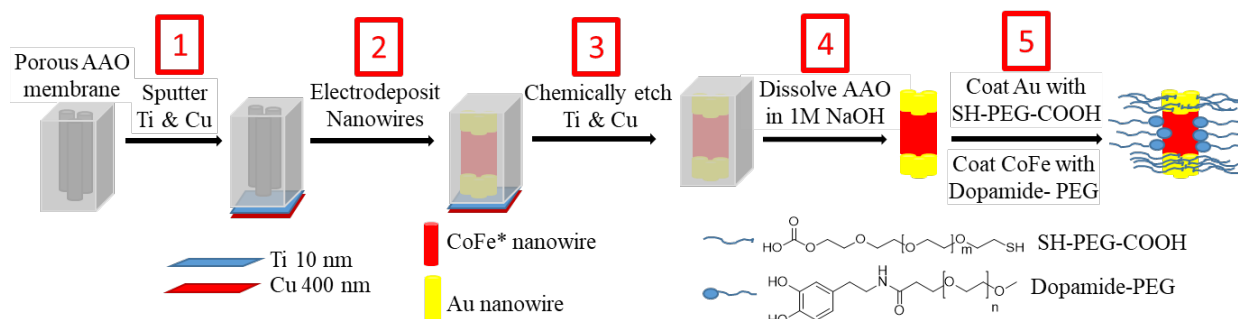

**Figure S1.** Multistep fabrication process for magnetic nanowires. \*Note that CoFe segment was replaced with Fe, Co, Ni for comparing different  $M_s$  nanowires.

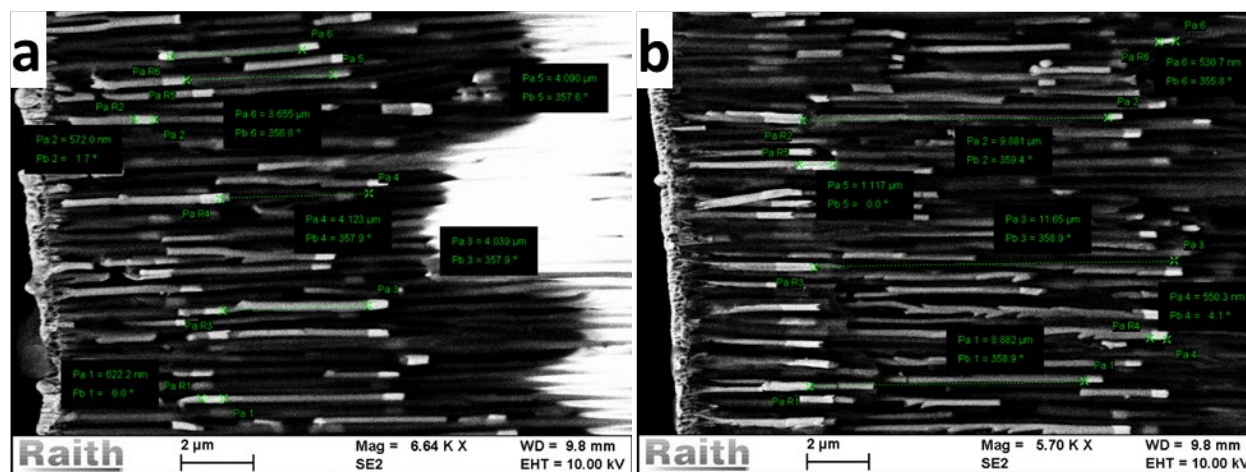

**Figure S2.** Cross-sectional SEM images of (a) 4  $\mu\text{m}$  and (b) 10  $\mu\text{m}$  CoFe nanowires aligned in AAO.

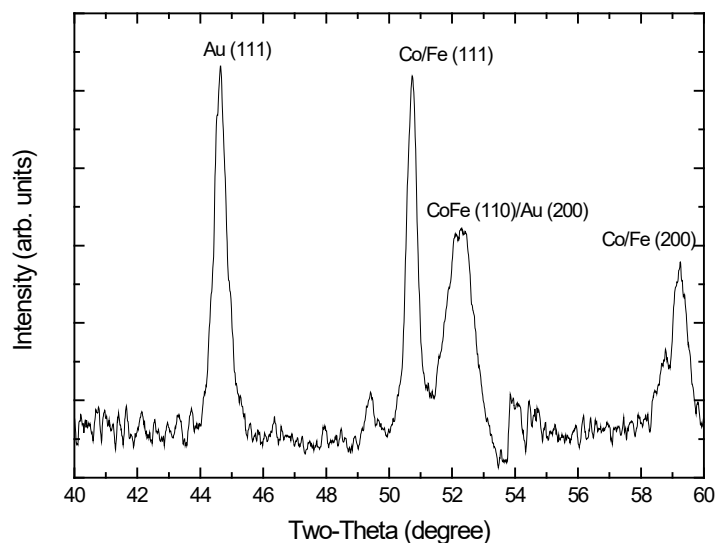

**Figure S3.** X-ray diffraction spectra of CoFe nanowires with Au-tips.

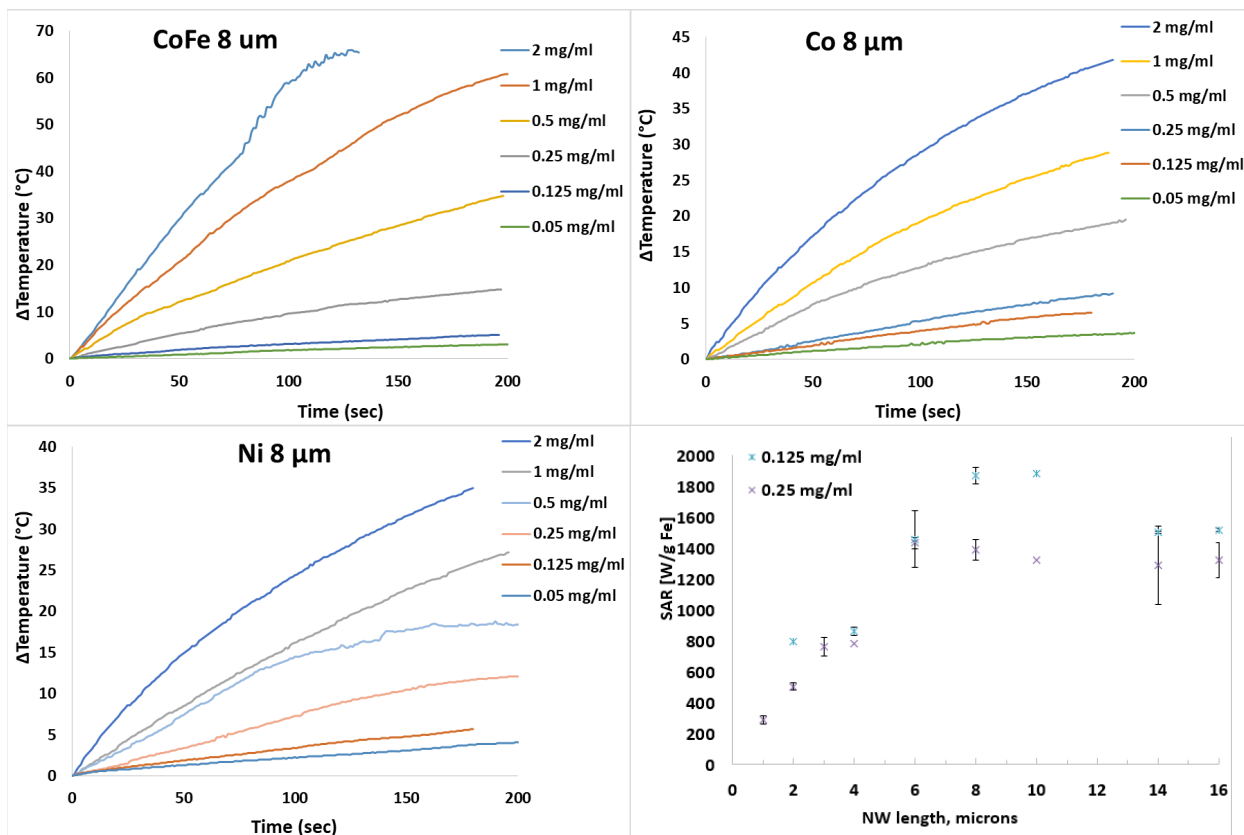

**Figure S4.** Temperature curves for 8  $\mu$ m CoFe, Co, and Ni nanowires in glycerol at different concentrations. SAR values for different length CoFe nanowires in glycerol at various concentrations

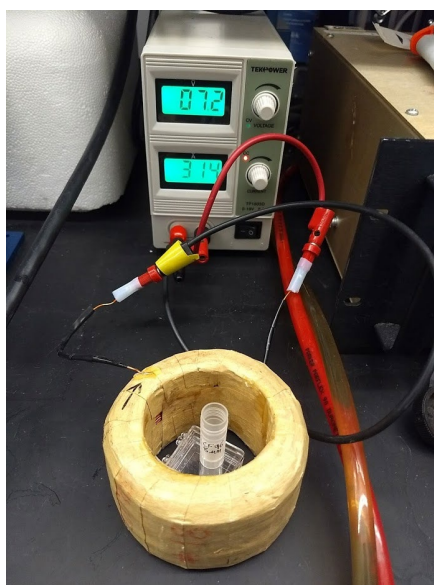

**Figure S5.** Picture of the Helmholtz coil and DC power supply used to magnetically align the nanowires prior to SAR or nanowarming measurements.

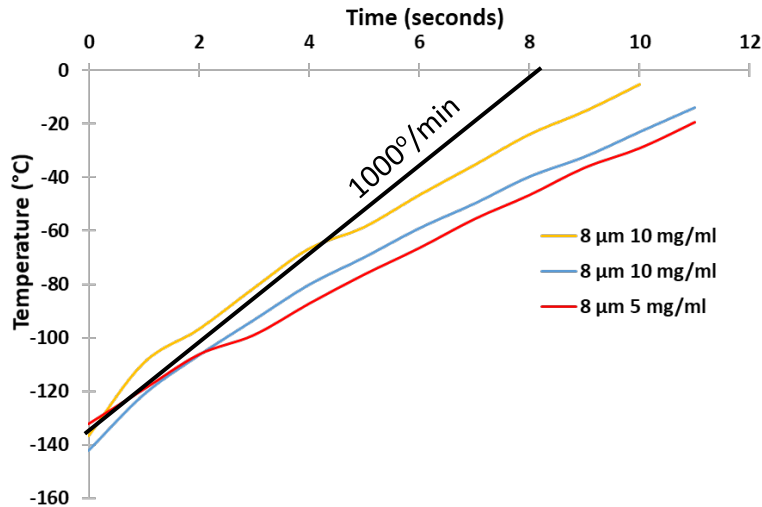

**Figure S6.** Nanowarming temperature curves for three different 8  $\mu\text{m}$  CoFe nanowire samples which were aligned parallel with the AMF prior to being vitrified.

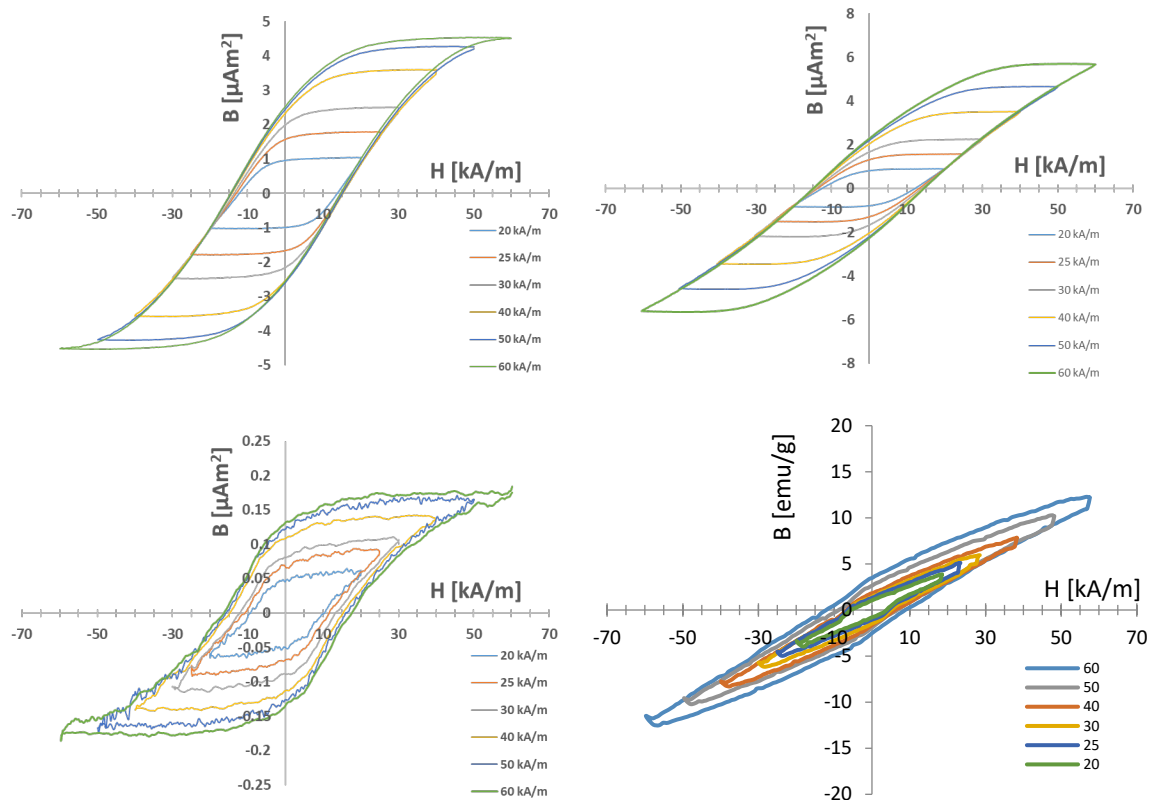

**Figure S7.** Minor loops for 8  $\mu\text{m}$  (a) Ni, (b) Co, and (c) Fe nanowires aligned in AAO parallel with the applied magnetic field. Also for (d) 8  $\mu\text{m}$  CoFe aligned in AAO perpendicular to the applied field. The reversal fields for the hysteresis loops were 20, 25, 30, 40, 50 and 60 kA/m ( $\pm 0.25$ ,  $\pm 0.31$ ,  $\pm 0.38$ ,  $\pm 0.5$ ,  $\pm 0.63$ , and  $\pm 0.75$  kOe).

**Table S1.** Table showing the electrolytic concentration, pH, and reduction potentials for Au, Ni, Co, Fe, and CoFe nanowires (NWs). All reduction potentials are vs. a saturated Ag/AgCl reference electrode.

| Comment                | Chemical                       | Concentration | pH  | Reduction |
|------------------------|--------------------------------|---------------|-----|-----------|
| Pure Au NWs            | $\text{KAu}(\text{CN})_2$      | 10 g/L        | 6.0 | -0.6 V    |
| Supporting electrolyte | $\text{K}_2\text{PO}_4$        | 120 g/L       | 6.0 |           |
| Supporting electrolyte | $\text{KH}_2\text{PO}_4$       | 30 g/L        | 6.0 |           |
| Magnetic NWs           |                                |               |     |           |
| Supporting electrolyte | $\text{H}_3\text{BO}_3$        | 0.4 M         | 3.0 |           |
| Supporting electrolyte | $\text{NH}_4\text{Cl}$         | 0.3 M         | 3.0 |           |
| Supporting electrolyte | Malonic acid                   | 0.001 M       | 3.0 |           |
| Wetting agent          | SDS                            | 0.0001 M      | 3.0 |           |
| Ni NWs                 | $\text{NiSO}_4$                | 0.2 M         | 3.0 | -0.9 V    |
| Co NWs                 | $\text{CoSO}_4$                | 0.2 M         | 3.0 | -0.9 V    |
| Fe NWs                 | $\text{FeSO}_4$                | 0.2 M         | 3.0 | -1.1 V    |
| CoFe NWs               | $\text{CoSO}_4, \text{FeSO}_4$ | 0.1 M, 0.2 M  | 3.0 | -1.1 V    |

The electrolyte solution was adjusted to pH 3.0 by adding  $\text{H}_2\text{SO}_4$  or  $\text{NaOH}$  as needed. Pulsed potential deposition with time-on 2.5 s at -1.1V/SCE and time-off 1 s -0.7 V/SCE.

**Table S2.**  $H_c$  and  $H_k$  from full hysteresis loops for the nanowires in AAO were:

|      | $H_k$ (Oe) | $H_c$ (Oe) |
|------|------------|------------|
| CoFe | 1680       | 170        |
| Fe   | 1800       | 180        |
| Co   | 2500       | 150        |
| Ni   | 750        | 170        |

It is important to recall that nanowire interactions will shear loops for nanowires in AAO compared to in a suspension because the nanowire density is greater. However, the  $M_s$  and anisotropy *comparisons* are important and are most practical in these aligned nanowire arrays.

## **Appendix. Iron concentration measurements by $T_1$ relaxation**

Longitudinal ( $T_1$ ) and transverse ( $T_2$ ) relaxation times of the nanoparticles in DI water were measured using a Bruker Minispec mq60 NMR Analyzer at 1.5 T (60 MHz) and 25°C using the inversion recovery sequence and the Carr-Purcell-Meiboom-Gill sequence, respectively. For each probe, the longitudinal ( $r_1$ ) and transverse ( $r_2$ ) relaxivities were determined by fitting to Equation S1, below. Refer to ESI S3 for details of how the iron concentration, [Fe], of each sample was quantified

$$r_i[\text{Fe}] = \frac{1}{T_{i,\text{obs}}} - \frac{1}{T_{i,\text{H}_2\text{O}}} \quad \text{where } i = 1 \text{ or } 2 \quad (\text{S1})$$

The concentration of Fe in each sample was quantified using a calibration curve of  $\text{FeCl}_3$  solutions of known concentrations. After measuring the relaxation times of the nanowire samples in DI water, an equal volume of  $\text{HNO}_3$  (aq) was added to each sample and they were stored at room temperature overnight. This treatment decomposes the nanowires into metal aqua species. The concentration of Fe in the final media was determined by measuring  $T_1$  of each sample using a calibration plot obtained from standard solutions of  $\text{FeCl}_3$  in 1:1  $\text{HNO}_3$ :DI water (same media as that of the decomposed nanowires). Note that the aqua Au species does not contribute to  $T_1$ , so this method enables rapid determination of only the Fe concentration in each sample. The total concentration of Fe, [Fe], in each sample was calculated using Equation S2, below.

$$r_{1,\text{FeCl}_3}[\text{Fe}] = \frac{1}{T_{1,\text{obs}}} - \frac{1}{T_{1,\text{H}_2\text{O}}} \quad (\text{S2})$$

### References

1. E. A. Weitz, C. Lewandowski, E. D. Smolensky, M. Marjanska and V. C. Pierre, *ACS Nano*, 2013, **7**, 5842-5849.
2. E. D. Smolensky, M. Marjanska and V. C. Pierre, *Dalton Trans.*, 2012, **41**, 8039-8046.

**Table S3. Effect of coating of segmented CoFe nanowires on relaxivity values**

| Au-tip (nm) | CoFe nanowires (nm) | $r_1$ ( $\text{mM}^{-1}\text{s}^{-1}$ ) | $r_2$ ( $\text{mM}^{-1}\text{s}^{-1}$ ) | $r_2/r_1$ | Coating                       |
|-------------|---------------------|-----------------------------------------|-----------------------------------------|-----------|-------------------------------|
| 200         | 200                 | 0.015                                   | 0.11                                    | 7.33      | Non-coated                    |
| 200         | 200                 | 0.03                                    | 1.06                                    | 35.3      | HS-PEG-COOH                   |
| 200         | 200                 | 0.31                                    | 13.4                                    | 43.2      | HS-PEG-COOH<br>+ Dopamide-PEG |

Daniel Shore, Sylvie L. Pailloux, Jinjin Zhang, Tom Gage, David J. Flannigan, Michael Garwood, Valérie C. Pierre, and Bethanie J.H. Stadler, "Electrodeposited Fe and Fe-Au Nanowires as MRI Contrast Agents," *Chemical Communications* **52** 12634-7 (2016). [doi:10.1039/C6CC06991F](https://doi.org/10.1039/C6CC06991F)
